# Supplementary material
Source: publisher figshare collection journal article supplement (https://acs.figshare.com/ndownloader/files/10185963)
Supplement: Supplementary file 1 [file 10185963]

## Supporting Information

Locally favored two-dimensional structures of block copolymer melts on non-neutral surfaces

Mani Sen<sup>1</sup>, Naisheng Jiang<sup>1</sup>, Maya K. Endoh<sup>1</sup>, Tadanori Koga<sup>1,2</sup>, Alexander Ribbe<sup>3</sup>, Atikur Rahman<sup>4</sup>, Daisuke Kawaguchi<sup>5</sup>, Keiji Tanaka<sup>6</sup>, Detlef-M. Smilgies<sup>7</sup>

<sup>1</sup>Department of Materials Science and Chemical Engineering, Stony Brook University, Stony Brook, New York 11794-2275

<sup>2</sup>Department of Chemistry, Stony Brook University, Stony Brook, New York 11794-3400

<sup>5</sup>Department of Polymer Science and Engineering, University of Massachusetts, Amherst, MA 01003

<sup>4</sup>Department of Physics, Indian Institute of Science Education and Research (IISER)-Pune, India, 411008

<sup>5</sup>Education Center for Global Leaders in Molecular Systems for Devices, Kyushu University, Fukuoka 819-0395, Japan

<sup>6</sup>Department of Applied Chemistry, Faculty of Engineering, Kyushu University, Fukuoka 819-0395, Japan

<sup>7</sup>Cornell High Energy Synchrotron Source, Cornell University, Ithaca, NY 14853

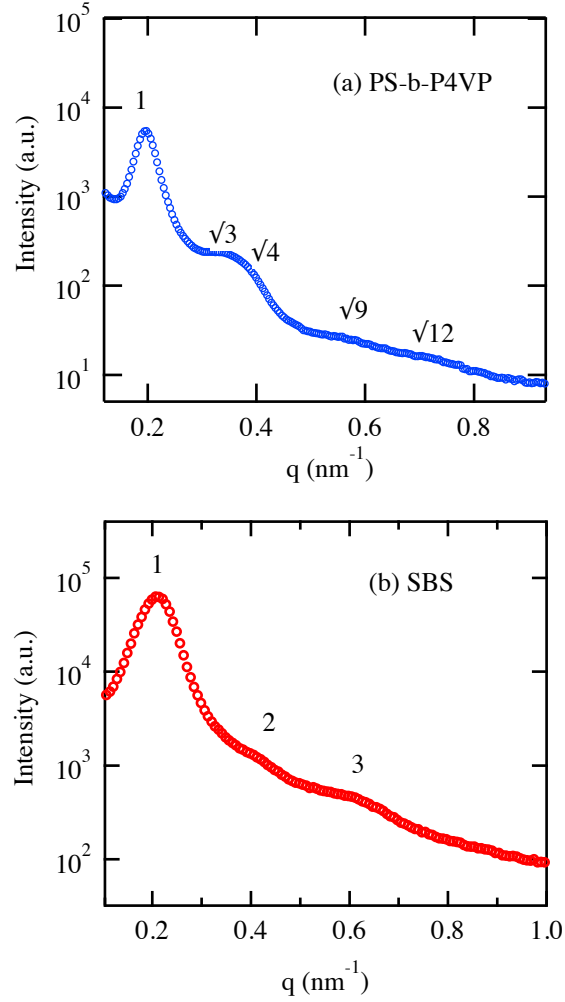

Fig. S1: Small angle x-ray scattering (SAXS) profiles of the bulk (a) PS-*block*-P4VP and (b) SBS samples measured at 25 °C. The measurements were performed at the X27C beamline of the National Synchrotron Light Source (NSLS), Brookhaven National Laboratory (BNL) at the X-ray wavelength ( $\lambda$ ) of 0.1371nm. The peak positions relative to the first order maximum ( $q_m$ ) are also indicated in the graph. The domain spacing ( $L_d$ ) was calculated by  $L_d=2\pi/q_m$ .

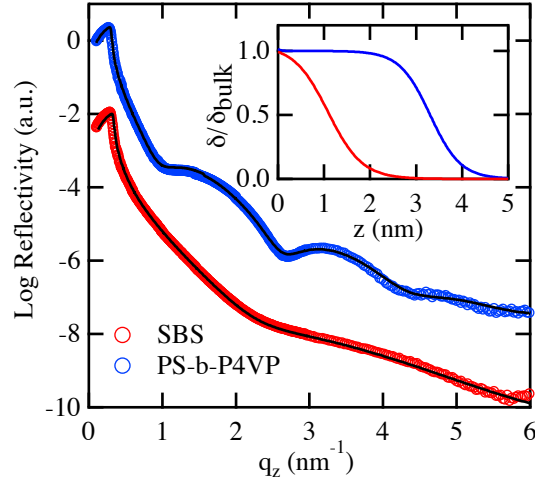

Fig. S2: XR profiles of the SBS and PS-*block*-P4VP flattened layers derived from the annealed SBS and PS-*block*-P4VP thin films for 100 h. We utilized a three-layer model (a Si substrate, a SiO<sub>x</sub> layer, and a polymer layer) to fit the XR data. A least-square fit (the black solid lines) to the XR profiles were performed using the dispersion ( $\delta$ ) profile shown in the inset. The dispersion values, which depend on the density values of the films<sup>1</sup>, were normalized by the bulk dispersion ( $\delta_{\text{bulk}}$ ) values. The thickness the SBS flattened layer and the roughness of the air-polymer interface was  $1.6 \pm 0.2$  nm and 0.6 nm; the thickness the PS-*block*-P4VP flattened layer and the roughness of the air-polymer interface was  $3.5 \pm 0.2$  nm and 0.2 nm from the best-fitting results.

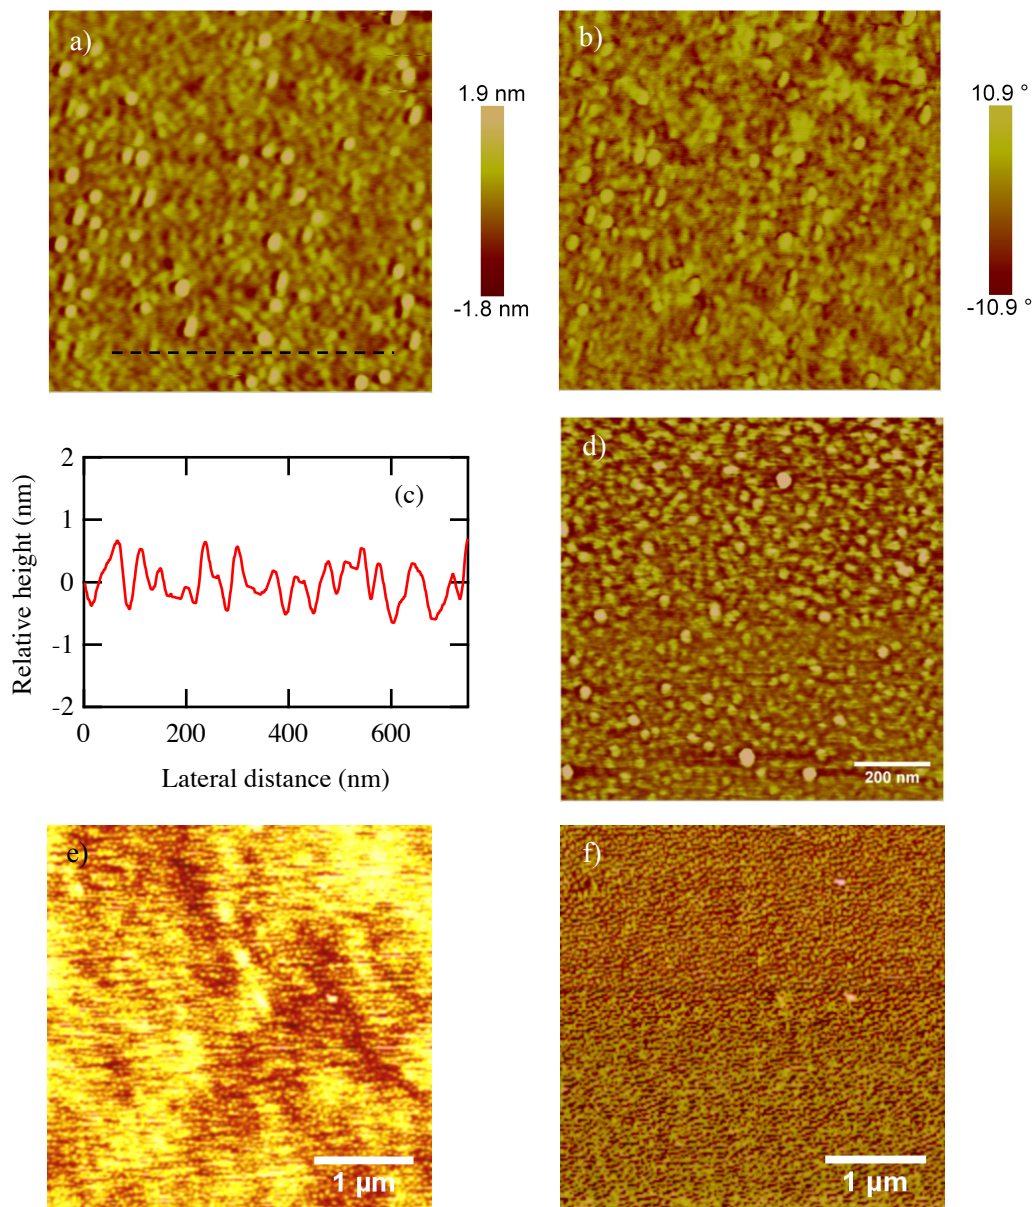

Fig. S3: AFM images (1μm x 1μm) of the PS-*block*-P4VP flattened layer: a) height image; b) phase image; c) height profile along the black dashed line shown in (a). The RMS roughness of the PS-*block*-P4VP flattened layer was estimated to be about 0.2 nm. (d) AFM phase image (1μm x 1μm) of the SBS flattened layer. In comparison of the SEM image shown in Fig. 2a, the bright region can be identified as the PB-rich region. To verify the homogeneity of the film surface, enlarged AFM images of the PS-*block*-PMMA flattened layer are shown: (e) height image; (f) phase image. The height scale is 0 - 4 nm.

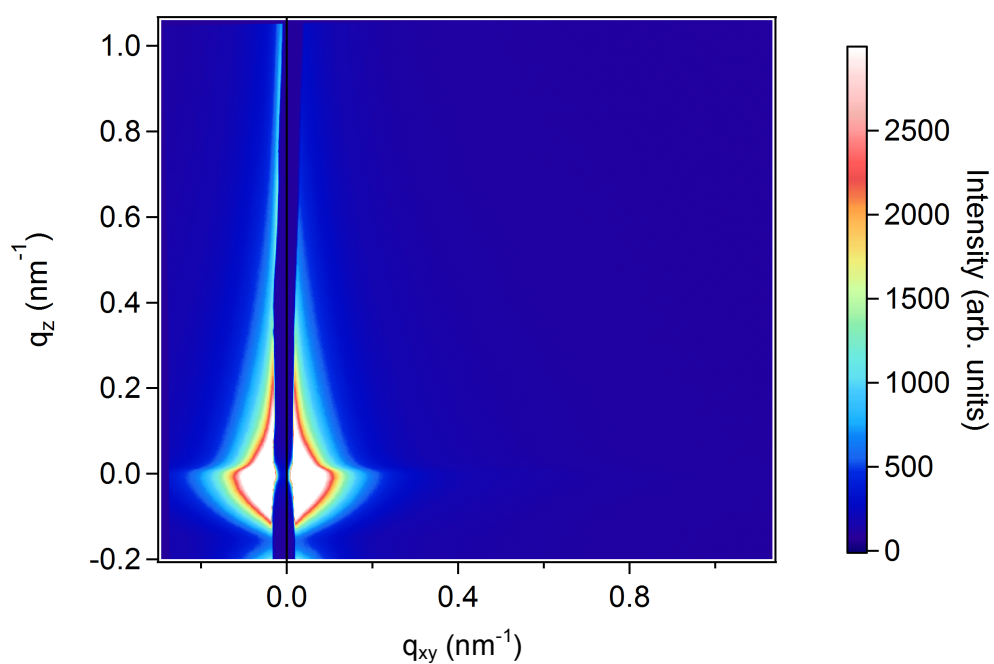

Fig. S4. 2D GISAXS image of the PS-*block*-P4VP flattened layer. The in-plane GISAXS profile was extracted at the exit angle (between the scattered beam and the film surface) of  $\alpha_f = 0.17^\circ$ , which corresponds to the  $q_{xy}$ -value of  $q_z = 0.15 \text{ nm}^{-1}$ .

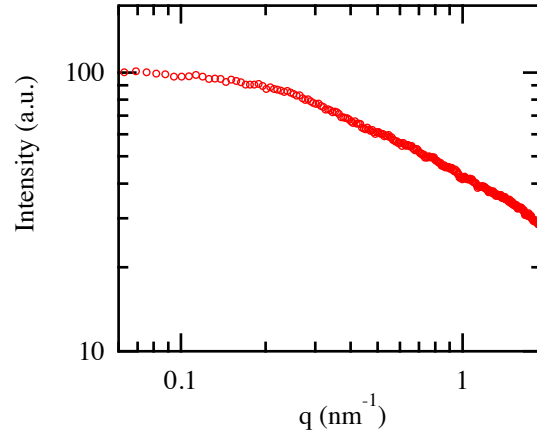

Fig. S5. Fourier transform profile of the SEM image of the PS-*block*-P4VP flattened layer shown in Fig. 2. There is a broad peak at around  $q = 0.2$  nm<sup>-1</sup>. When compared it to the GISAXS profile shown in Fig. 3, there are clear differences between them: an up-turn at  $q_{xy} < 0.1$  nm<sup>-1</sup> and the lack of the broad peak in the GISAXS profile. This upturn suggests the presence of a larger structure composed of the percolating structure and would make the broad peak invisible.

**Orientation of phenyl groups:** The intensity of SFG signal ( $I^{\text{SFG}}$ ) is proportional to the absolute value of the effective sum-frequency susceptibility tensor of the interface ( $\chi_{\text{eff}}^{(2)}$ ):

$$I^{\text{SFG}} \propto |\chi_{\text{eff}}^{(2)}|^2 = \left| \chi_{\text{NR}}^{(2)} + \sum_q \frac{A_q}{\omega_{\text{IR}} - \omega_q + i\Gamma_q} \right|^2 \quad (\text{S1})$$

where  $\chi_{\text{NR}}^{(2)}$  is the non-resonant background contribution.  $A_q$ ,  $\omega_q$  and  $\Gamma_q$  are strength, resonant frequency and damping coefficient of the  $q^{\text{th}}$  vibration mode, respectively. Each peak on the SF spectra was fitted by eq. S1 using  $A_q$ ,  $\omega_q$  and  $\Gamma_q$  as fitting parameters. Panels (a) and (b) of Fig. S4 show the curve-fitting results of the SFG spectra for the annealed SBS film with the *ssp* and *ppp* polarization combinations, respectively. The peak assignment was described in the main text.

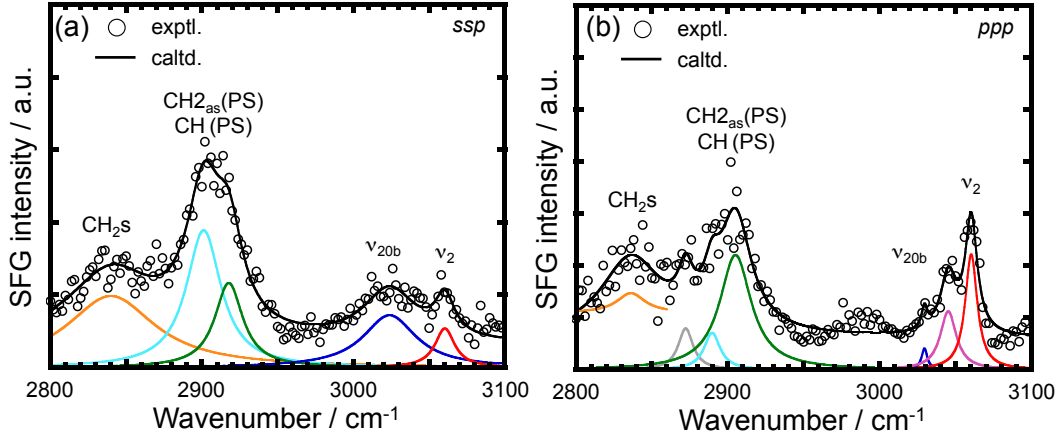

Fig. S4. SFG spectra with (a) the *ssp* and (b) *ppp* polarization combinations for the annealed SBS film. Open circles and solid lines denote experimental and calculated data, respectively.

The macroscopic sum-frequency susceptibility tensor  $\chi_{ijk}$  is related to the microscopic hyperpolarizability tensor elements  $\beta_{ijk'}$  in the molecular coordinate system defined by  $a$ ,  $b$ ,  $c$  axes. Phenyl groups can be treated as  $C_{2v}$  symmetry<sup>3,4</sup>. In this case,

$$\chi_{xxz} = \chi_{yyz}, \chi_{xzx} = \chi_{yzy}, \chi_{zxx} = \chi_{zyy}, \chi_{zzz} \quad (\text{S2})$$

There exist two methods to analyze the orientation of phenyl rings. One is based on the SFG intensity ratio of two different vibration modes for phenyl groups with the *ssp* polarization combination. Another is the calculation from the SFG intensity ratio of the *ssp* polarization combination over the *ppp* one for the  $\nu_2$  vibration mode,  $(I_{\text{ssp},\nu_2}/I_{\text{ppp},\nu_2})^{3,5,6}$ . In this study, the latter method was adopted because unknown parameters are involved in the former one.

In general,  $\chi_{\text{eff},\text{ssp}}^{(2)}$  and  $\chi_{\text{eff},\text{ppp}}^{(2)}$  can be expressed as follows;

$$\begin{aligned} \chi_{\text{eff},\text{ssp}}^{(2)} &= F_{\text{ssp},\text{yyz}} \chi_{\text{yyz}} \\ &= L_{\text{yy}}(\omega_{\text{SF}}) L_{\text{yy}}(\omega_{\text{Vis}}) L_{\text{zz}}(\omega_{\text{IR}}) \sin \theta_{\text{IR}} \chi_{\text{yyz}} \end{aligned} \quad (\text{S3a})$$

$$\begin{aligned} \chi_{\text{eff},\text{ppp}}^{(2)} &= F_{\text{ppp},\text{xxz}} \chi_{xxz} + F_{\text{ppp},\text{xzx}} \chi_{xzx} + F_{\text{ppp},\text{zxx}} \chi_{zxx} + F_{\text{ppp},\text{zzz}} \chi_{zzz} \\ &= -L_{\text{xx}}(\omega_{\text{SFG}}) L_{\text{xx}}(\omega_{\text{Vis}}) L_{\text{zz}}(\omega_{\text{IR}}) \cos \theta_{\text{SF}} \cos \theta_{\text{Vis}} \sin \theta_{\text{IR}} \chi_{xxz} \\ &\quad - L_{\text{xx}}(\omega_{\text{SFG}}) L_{\text{zz}}(\omega_{\text{Vis}}) L_{\text{xx}}(\omega_{\text{IR}}) \cos \theta_{\text{SF}} \sin \theta_{\text{Vis}} \cos \theta_{\text{IR}} \chi_{xzx} \\ &\quad + L_{\text{zz}}(\omega_{\text{SFG}}) L_{\text{xx}}(\omega_{\text{Vis}}) L_{\text{xx}}(\omega_{\text{IR}}) \sin \theta_{\text{SF}} \cos \theta_{\text{Vis}} \cos \theta_{\text{IR}} \chi_{zxx} \end{aligned} \quad (\text{S3b})$$

$$+L_{zz}(\omega_{\text{SFG}})L_{zz}(\omega_{\text{Vis}})L_{zz}(\omega_{\text{IR}})\sin\theta_{\text{SF}}\sin\theta_{\text{Vis}}\sin\theta_{\text{IR}}\chi_{zzz}$$

where  $L_{ii}(i = x, y, z)$  are Fresnel coefficients. The angle between surface normal and beam is expressed as  $\theta$ . The subscripts Vis and IR denote the input beams. To calculate Fresnel factors for the interfaces, the following equations are used<sup>7</sup>,

$$L_{xx}(\omega) = \frac{2n_1(\omega)\cos\theta_1}{n_2(\omega)\cos\theta_1+n_1(\omega)\cos\theta_2} \times \frac{2n_2(\omega)\cos\theta_2}{n_3\cos\theta_2+n_2(\omega)\cos\theta_3} \times \frac{\cos\theta_3}{\cos\theta_1} \quad (\text{S4a})$$

$$L_{yy}(\omega) = \frac{2n_1(\omega)\cos\theta_1}{n_1(\omega)\cos\theta_1+n_2(\omega)\cos\theta_2} \times \frac{2n_2(\omega)\cos\theta_2}{n_2\cos\theta_2+n_3(\omega)\cos\theta_3} \quad (\text{S4b})$$

$$L_{zz}(\omega) = \frac{2n_1(\omega)\cos\theta_1}{n_2(\omega)\cos\theta_1+n_1(\omega)\cos\theta_2} \times \frac{2n_2(\omega)\cos\theta_2}{n_3\cos\theta_2+n_2(\omega)\cos\theta_3} \times \frac{n_1}{n_3} \times \left(\frac{n_3(\omega)}{n'(\omega)}\right)^2 \quad (\text{S4c})$$

where  $n'$  is the refractive index of the SBS/SiO<sub>x</sub> interfacial layer. The value of 1.50 was here used. In eq. S4,  $q_i$  is the incidence angle in the medium  $i$ . For the  $\nu_2$  mode, the component of  $c$  for an isotropic interface are given by Refs. 3 and 5,

$$\begin{aligned} \chi_{yyz,\nu_2} &= \chi_{xxz,\nu_2} \\ &= \frac{1}{4}N_s(\beta_{aac,\nu_2} + \beta_{bbc,\nu_2} + 2\beta_{ccc,\nu_2})\langle\cos\phi\rangle + \frac{1}{4}N_s(\beta_{aac,\nu_2} + \beta_{bbc,\nu_2} - 2\beta_{ccc,\nu_2})\langle\cos^3\phi\rangle \end{aligned} \quad (\text{S5})$$

$$\chi_{zyy,\nu_2} = \chi_{zyx,\nu_2} = \chi_{xzx,\nu_2} = \chi_{zxx,\nu_2} = -\frac{1}{4}N_s(\beta_{aac,\nu_2} + \beta_{bbc,\nu_2} - 2\beta_{ccc,\nu_2})(\langle\cos\phi\rangle - \langle\cos^3\phi\rangle) \quad (\text{S6})$$

$$\chi_{zzz,\nu_2} = \frac{1}{2}N_s(\beta_{aac,\nu_2} + \beta_{bbc,\nu_2})\langle\cos\phi\rangle - \frac{1}{2}N_s(\beta_{aac,\nu_2} + \beta_{bbc,\nu_2} - 2\beta_{ccc,\nu_2})\langle\cos^3\phi\rangle \quad (\text{S7})$$

Using eqs from S3 to S7, the  $(I_{ssp,n2}/I_{ppp,n2})$  value can be obtained. Postulating that  $F_{ppp,xzx}$  and  $F_{ppp,zxx}$  are comparable with opposite signs and that  $\chi_{xzx}$  is equal to  $\chi_{zxx}$  for the  $\nu_2$  mode, eq. S3b is simplified to be;

$$\chi_{\text{eff},ppp}^{(2)} \cong F_{ppp,xzx}\chi_{xxz} + F_{ppp,zzz}\chi_{zzz} \quad (\text{S8})$$

Thus, the  $(I_{ssp,n2}/I_{ppp,n2})$  value is given by,

$$\frac{I_{ssp,n2}}{I_{ppp,n2}} = \left| \frac{\chi_{\text{eff},ssp,\nu_2}}{\chi_{\text{eff},ppp,\nu_2}} \right|^2 \cong \left| \frac{F_{ssp,yyz}\chi_{yyz,\nu_2}}{F_{ppp,xzx}\chi_{xxz,\nu_2} + F_{ppp,zzz}\chi_{zzz,\nu_2}} \right|^2 \quad (\text{S9})$$

Functional groups existed at the interface generally possess an orientation angle with a certain distribution. Here the angle distribution ( $\sigma$ ) was defined by Gaussian and applied to eq.S9<sup>8</sup>.

$$\langle\cos^n\phi\rangle = \int_0^\pi \cos^n\phi f(\phi) \sin\phi d\phi \quad (\text{S10})$$

$$f(\phi) = N \exp\{-(\phi-\phi_0)^2/2\sigma^2\} \quad (\text{S11})$$

where  $\phi_0$  is the averaged tilt angle of phenyl groups.

Fig. S5 shows the calculated  $I_{ssp,n2}/I_{ppp,n2}$  as a function of  $\phi$  with a tilt angle distribution ( $\sigma$ ). Comparing the experimental  $I_{ssp,n2}/I_{ppp,n2}$  value of 1.63 with those shown in Fig. S8, we can claim that  $f$  is possibly 55° with  $\sigma = 0^\circ$  or 90° with  $\sigma = 30^\circ$  for the two extreme cases. Hence, the phenyl rings roughly orient themselves parallel to the substrate surface.

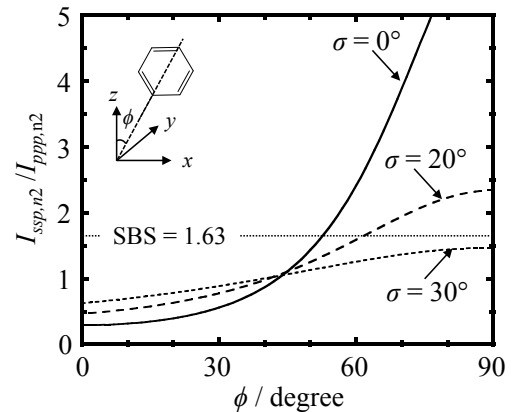

Fig. S5. SFG intensity ratio of the  $\nu_2$  mode with  $ssp$  over  $ppp$  polarization combinations as a function of averaged tilt angle ( $\phi$ ).



## References:

- [1] P. Gin, N. S. Jiang, C. Liang, T. Taniguchi, B. Akgun, S. K. Satija, M. K. Endoh, and T. Koga, Revealed Architectures of Adsorbed Polymer Chains at Solid-Polymer Melt Interfaces *Phys. Rev. Lett.* **2012**, 109, 265501.
- [2] Z. Chen, Y. R. Shen, and G. A. Somorjai, Studies of Polymer Surfaces by Sum Frequency Generation Vibrational Spectroscopy, *Annu. Rev. Phys. Chem.* **2002**, 53, 437-465.
- [3] C. Hirose, N. Akamatsu, and K. Domen, Formulas for the Analysis of the Surface SFG Spectrum and Transformation Coefficients of Cartesian SFG Tensor Components, *Appl. Spectrosc.* **1992**, 46, 1051-1072.
- [4] K. S. Gautam, A. D. Schwab, A. Dhinojwala, D. Zhang, S. M. Dougal, and M. S. Yeganeh, Molecular Structure of Polystyrene at Air/Polymer and Solid/Polymer Interfaces, *Phys. Rev. Lett.* **2000**, 85, 3854.
- [5] X. Lu, J. N. Mayers, and Z. Chen, Molecular Ordering of Phenyl Groups at the Buried Polystyrene/Metal Interface, *Langmuir* **2014**, 30, 9418-9422.
- [6] Y. Tateishi, N. Kai, H. Noguchi, K. Uosaki, T. Nagamura, and K. Tanaka, Local Conformation of Poly(methyl methacrylate) at Nitrogen and Water Interfaces, *Polym. Chem.* **2010**, 1, 303-311.
- [7] H. Noguchi, H. Minowa, T. Tominaga, J. P. Gong, Y. Osada, and K. Uosaki, Interfacial Water Structure at Polymer Gel/Quartz Interfaces Investigated by Sum Frequency Generation Spectroscopy, *Phys. Chem. Chem. Phys.* **2008**, 10, 4987-4993.
- [8] X. Wei, X. Zhuang, S.-C. Hong, X. Zhuang, T. Goto, and Y. R. Shen, Sum-Frequency Vibrational Spectroscopic Study of a Rubbed Polymer Surface, *Phys. Rev. Lett.* **1999**, 82, 4256.
